# Supplementary material
Source: publisher figshare collection journal article supplement (https://aacr.figshare.com/articles/dataset/_/22674921)
Supplement: Supplementary file 1 [file 40244718]

**Supplementary-Table-6. Treatment modalities and reported adverse events by quartile of period of inclusion. NA: not applicable**

|                                                | Overall                                  | Quartile 1     | Quartile 2     | Quartile 3       | Quartile 4       | p-value (Quartiles) |
|------------------------------------------------|------------------------------------------|----------------|----------------|------------------|------------------|---------------------|
|                                                | n/N (%), or median [interquartile range] |                |                |                  |                  |                     |
| <b>Treatments</b>                              |                                          |                |                |                  |                  |                     |
| Corticosteroids                                | 36/40 (90%)                              | 10/10 (100%)   | 9/10 (90%)     | 8/10 (80%)       | 9/10 (90%)       | 0.35                |
| - days from presentation to start              | 1 [0; 3]                                 | 2 [0; 4]       | 1 [0; 2]       | 1 [0; 6]         | 1 [0; 3]         | 0.87                |
| - days from severe criteria to start           | -3 [-3; 0]                               | 0 [-6; 1]      | -1 [-3; 1]     | -3 [-5; -2]      | -3 [-4; 0]       | 0.42                |
| - maximal dose (g/day)*                        | 0.9 [0.05; 1]                            | 1 [1; 1]       | 1 [1; 1]       | 0.05 [0.02; 0.3] | 0.06 [0.03; 0.6] | 0.0005              |
| - mean dose in 1 <sup>st</sup> month (mg/day)* | 117 [40;165]                             | 155 [123; 223] | 165 [114; 190] | 42 [0; 101]      | 53 [16; 131]     | 0.005               |
| Abatacept                                      | 29/40 (73%)                              | 7/10 (70%)     | 8/10 (80%)     | 6/10 (60%)       | 8/10 (80%)       | 0.87                |
| - days from presentation to start              | 6 [2; 13]                                | 7 [2; 17]      | 4 [1; 16]      | 5 [2; 10]        | 7 [4; 15]        | 0.75                |
| - days from severe criteria to start           | 2 [1; 4]                                 | 3 [2; 9]       | 2 [0; 12]      | 1 [1; 2]         | 3 [1; 4]         | 0.54                |
| - total number of doses                        | 5 [3; 6]                                 | 3 [2; 8]       | 6 [5; 8]       | 4 [4; 5]         | 5 [3; 5]         | 0.05                |
| - mean dosage /administration (mg/kg)          | 19 [16; 21]                              | 17 [12; 20]    | 18 [16; 20]    | 21 [18; 23]      | 20 [16; 21]      | 0.15                |
| - total dose within 15days of start (mg/kg)    | 60 [45; 63]                              | 41 [24; 60]    | 59 [54; 70]    | 63 [59; 71]      | 59 [39; 64]      | 0.05                |
| Ruxolitinib                                    | 18/40 (45%)                              | 0/10 (0%)      | 6/10 (60%)     | 5/10 (50%)       | 7/10 (70%)       | 0.005               |
| - days from presentation to start              | 8 [3; 12]                                | NA             | 8 [2; 30]      | 5 [2; 22]        | 8 [4; 17]        | 0.96                |
| - days from severe criteria to start           | 3 [1; 7]                                 | NA             | 5 [1; 46]      | 1 [0; 11]        | 3 [1; 6]         | 0.81                |
| - maximal dose (mg/day)                        | 30 [30; 30]                              | NA             | 30 [30; 30]    | 30 [20; 30]      | 30 [30; 30]      | 0.28                |
| - mean dose (mg/day)                           | 27 [24; 29]                              | NA             | 28 [26; 28]    | 21 [12; 24]      | 22 [19; 24]      | 0.0009              |
| - duration of treatment (days)                 | 24 [15; 36]                              | NA             | 28 [20; 43]    | 20 [18; 33]      | 25 [9; 39]       | 0.71                |
| Intravenous immunoglobulin**                   | 7/40 (18%)                               | 2/10 (20%)     | 2/10 (20%)     | 0/10 (0%)        | 3/10 (30%)       | 0.85                |
| Plasmapheresis                                 | 10/40 (25%)                              | 8/10 (80%)     | 2/10 (20%)     | 0/10 (0%)        | 0/10 (0%)        | <0.0001             |
| Mycophenolate mofetil                          | 6/40 (15%)                               | 4/10 (40%)     | 1/10 (10%)     | 0/10 (0%)        | 1/10 (10%)       | 0.05                |
| Tacrolimus                                     | 1/40 (2%)                                | 1/10 (10%)     | 0/10 (0%)      | 0/10 (0%)        | 0/10 (0%)        | 0.17                |
| <b>Adverse events ***</b>                      |                                          |                |                |                  |                  |                     |
| Infections (non COVID-19)                      | 18/40 (45%)                              | 6/10 (60%)     | 5/10 (50%)     | 3/10 (30%)       | 4/10 (40%)       | 0.25                |
| - fatal                                        | 2/40 (5%)                                | 2/10 (20%)     | 0/10 (0%)      | 0/10 (0%)        | 0/10 (0%)        | 0.05                |
| COVID-19                                       | 6/40 (15%)                               | 0/10 (0%)      | 2/10 (20%)     | 4/10 (40%)       | 0/10 (0%)        | 0.69                |
| - fatal                                        | 3/40 (8%)                                | 0/10 (0%)      | 1/10 (10%)     | 2/10 (20%)       | 0/10 (0%)        | 0.79                |
| Venous thrombo-embolism                        | 7/40 (18%)                               | 4/10 (40%)     | 3/10 (30%)     | 0/10 (0%)        | 0/10 (0%)        | 0.005               |
| Hemorrhage exteriorized                        | 3/40 (8%)                                | 1/10 (10%)     | 0/10 (0%)      | 1/10 (10%)       | 1/10 (10%)       | 0.79                |
| Anemia requiring transfusion                   | 12/40 (30%)                              | 4/10 (40%)     | 5/10 (50%)     | 1/10 (10%)       | 2/10 (20%)       | 0.12                |
| Diabetes (cortico-induced)                     | 7/36 (19%)                               | 3/10 (30%)     | 2/9 (22%)      | 2/8 (25%)        | 0/9 (0%)         | 0.13                |

\* dose equivalent to intravenous methylprednisolone in milligram (mg) per day in all patients

\*\* Intravenous immunoglobulin started by other teams before transfer to our hospital for poor evolution and stopped upon admission in our hospital in 5/7 cases

\*\*\* evaluated during the index hospitalization for myotoxicity, or active treatment with immunosuppressant (i.e, prednisone per os ≥7mg/day), whichever period of follow-up is longer
